# Supplementary material
Source: PubMed Central journal article supplement (PMC6212652)
Supplement: blood837633-suppl1.pdf [file blood837633-suppl1.pdf]

## **ILROG STEERING COMMITTEE**

### **JOACHIM YAHALOM, M.D.**

**Chairman, ILROG**

Professor of Radiation Oncology  
Memorial Sloan Kettering Cancer Center  
New York, NY, USA

---

### **LENA SPECHT, M.D.**

**Vice Chairman, ILROG**

Professor of Oncology  
Rigshospitalet, Copenhagen University Hospital  
Copenhagen, Denmark

---

### **BERTHE M.P. ALEMAN, M.D., PH.D.**

Radiation Oncologist  
Department of Radiotherapy  
The Netherlands Cancer Institute  
Antoni van Leeuwenhoek Hospital  
Amsterdam, The Netherlands

---

### **ANNE KIIL BERTHELSEN, M.D.**

Chief Physician  
Rigshospitalet, Copenhagen University Hospital  
PET & Cyclotron Unit and the Department of Radiotherapy  
Copenhagen, Denmark

---

### **LOUIS S. CONSTINE, M.D.**

Professor of Radiation Oncology and Pediatrics  
Vice Chair, Dept. of Radiation Oncology  
University of Rochester Medical Center  
Rochester, New York, USA

---

### **BOUTHAINA DABAJA, M.D.**

Associate Professor and Section Chief Lymphoma  
Department of Radiation Oncology  
University of Texas MD Anderson Cancer Center  
Houston, Texas, USA

---

**KARIN DIECKMANN, M.D.**

Professor  
Department of Radiation Oncology  
Medical University of Vienna  
General Hospital of Vienna  
Vienna, Austria

---

**HANS THEODOR EICH, M.D.**

Head of the Department of Radiation Oncology  
University of Munster  
Munster, Germany

---

**THEODORE GIRINSKY, M.D. (MEMBER EMERITUS)**

Professor Emeritus, Radiation Oncology  
Institut Gustave Roussy  
Villejuif, South Paris, France

---

**DAVID HODGSON, M.D.**

Associate Professor  
Department of Radiation Oncology  
University of Toronto  
Princess Margaret Cancer Centre  
Toronto, Ontario, Canada

---

**RICHARD HOPPE, M.D.**

The Henry S. Kaplan-Harry Lebeson in Cancer Biology and Professor  
Department of Radiation Oncology  
Stanford University  
Stanford, CA, USA

---

**TIM ILLIDGE, M.D., PH.D.**

Professor of Targeted Therapy and Oncology  
School of Cancer and Imaging Sciences  
University of Manchester  
Manchester Academic Health Science Centre  
Manchester Cancer Research Centre  
The Christie NHS Foundation Trust  
Manchester, England, UK

---

**YOULIA KIROVA, M.D.**

Senior Radiation Oncologist  
Department of Radiation Oncology  
Institut Curie  
Paris, France

---

**SIDDHARTHA LASKAR, M.D.**

Attending, Department of Radiation Oncology  
Tata Memorial Center  
Mumbai, India

---

**YE-XIONG LI, M.D.**

President, Chinese Society of Radiation Oncology  
Editor-in-Chief, Chinese Journal of Radiation Oncology  
Professor and Chairman  
Department of Radiation Oncology  
Cancer Hospital and Institute  
Chinese Academy of Medical Sciences and Peking Union Medical College  
Beijing, China

---

**PETER MAUCH, M.D.**

Professor of Radiation Oncology  
Harvard Medical School  
Boston, MA, USA

---

**GEORGE MIKHAEL, M.D.**

Professor, Radiation Oncology  
Consultant Clinical Oncologist  
Head of Clinical Oncology & Radiotherapy  
Guy's & St. Thomas' NHS Foundation Trust  
London, England, UK

---

**ANDREA NG, M.D.**

Associate Professor of Radiation Oncology  
Brigham and Women's Hospital  
Dana-Farber Cancer Institute  
Harvard Medical School  
Boston, MA, USA

---

**MASAHIKO OGUCHI, M.D., PH.D.**

Hospital Deputy Director  
Department Director, Radiation Oncology  
Department Director, Radiation Administration  
Cancer Institute Hospital, The Japanese Foundation for Cancer Research  
Tokyo, Japan

---

---

**JOHN P. PLASTARAS, M.D., PH.D.**

Associate Professor  
Chief of GI/Lymphoma Service  
Department of Radiation Oncology  
University of Pennsylvania  
Philadelphia, PA, USA

---

---

**UMBERTO RICARDI, M.D.**

Full Professor of Radiation Oncology  
Chairman Radiation Oncology Department  
University of Turin  
Torino, Italy

---

---

**CHANG-OK SUH, M.D., PH.D.**

Professor  
Department of Radiation Oncology  
Yonsei Cancer Center  
Yonsei University Health System  
Seoul, Korea

---

---

**STEPHANIE TEREZAKIS, M.D.**

Assistant Professor  
Residency Program Director  
Department of Radiation Oncology and Molecular Radiation Sciences  
Sidney Kimmel Comprehensive Cancer Center at Johns Hopkins  
Baltimore, MD, USA

---

---

**RICHARD W. TSANG, M.D.**

Radiation Oncologist  
Princess Margaret Cancer Centre  
University Health Network  
Toronto, Ontario, Canada

---

---

**LYNN D. WILSON, M.D.**

Professor  
Vice Chairman and Clinical Director  
Department of Therapeutic Radiology  
Yale University School of Medicine  
New Haven, CT, USA

---

**ANDREW WIRTH, M.D.**

Associate Professor  
Department of Radiation Oncology and Cancer Imaging  
Peter MacCallum Cancer Center  
East Melbourne, Victoria, Australia

---
